# Supplementary material
Source: PubMed Central journal article supplement (PMC5314999)
Supplement: Supp_Figure1.pdf [file Supp_Figure1.pdf]

## Supplementary Data

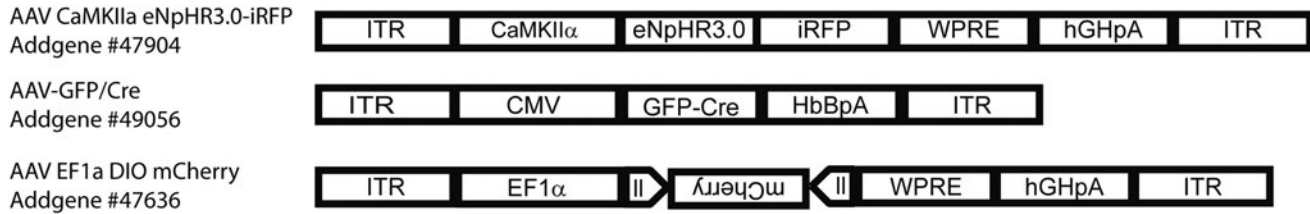

| <b>Feature</b> | <b>Description</b>                                                      |
|----------------|-------------------------------------------------------------------------|
| ITR            | Inverted terminal repeats of AAV serotype 2                             |
| CamKIIα        | Ca <sup>2+</sup> /calmodulin-dependent protein kinase II alpha promoter |
| eNpHR3.0       | engineered <i>Natronomonas pharaonis</i> halorhodopsin version 3.0      |
| iRFP           | Infrared Fluorescent Protein                                            |
| WPRE           | woodchuck hepatitis virus post-transcriptional regulatory element       |
| hGHpA          | human growth hormone polyadenylation signal                             |
| CMV            | human cytomegalovirus immediate-early promoter                          |
| GFP-Cre        | Green Fluorescent Protein fused to Cre recombinase                      |
| HbBpA          | human β-globin polyadenylation signal                                   |
| EF1α           | human elongation factor 1 alpha promoter                                |
| II             | double lox sites (loxP and lox2272)                                     |
| mCherry        | monomeric Cherry Fluorescent Protein                                    |

**Supplementary Figure S1.** AAV constructs used in experiments with the Addgene numbers.

---
