# Supplementary material
Source: PubMed Central journal article supplement (PMC5314999)
Supplement: Supp_Figure2.pdf [file Supp_Figure2.pdf]

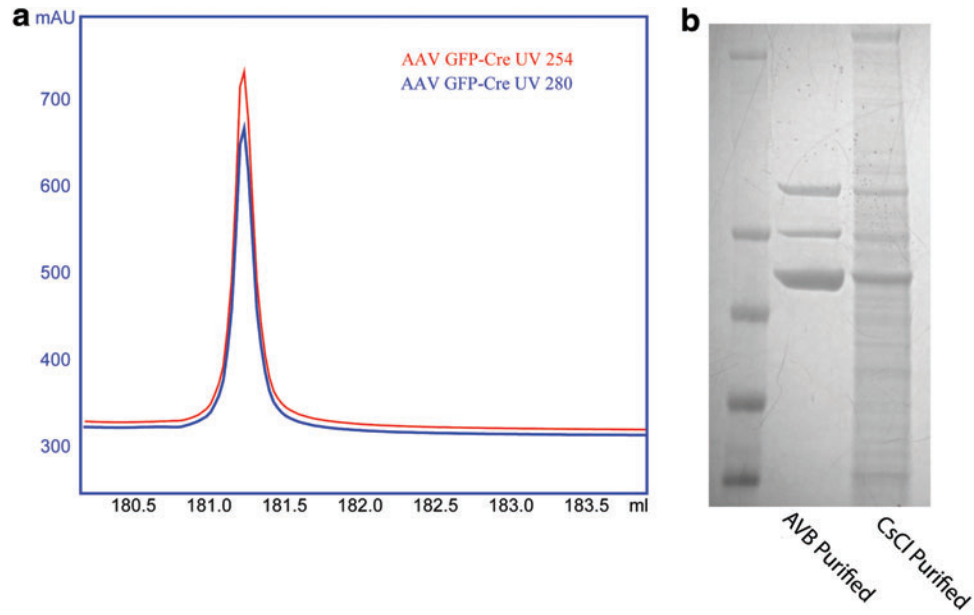

**Supplementary Figure S2.** AAV purification quality controls. AAV was collected from cells, freeze-thawed 3 times, and treated with Benzonase for 1 hour. The solution was spun down and the supernatant was filtered and ran through a Hi-Trap AVB column. **(a)** AAV was eluted with 15 mM Citrate buffer and fraction with peak A245/A280 absorption was collected. The eluted AAV was dialyzed overnight with 3 buffer changes, 12 uL was separated by PAGE and visualized by Simply Blue staining. **(b)** The banding on the gel shows the three AAV capsid proteins (VP1, VP2 and VP3) for AVB purified compared to CsCl purified.

---
