# Supplementary material
Source: PubMed Central journal article supplement (PMC5314999)
Supplement: Supp_Figure3.pdf [file Supp_Figure3.pdf]

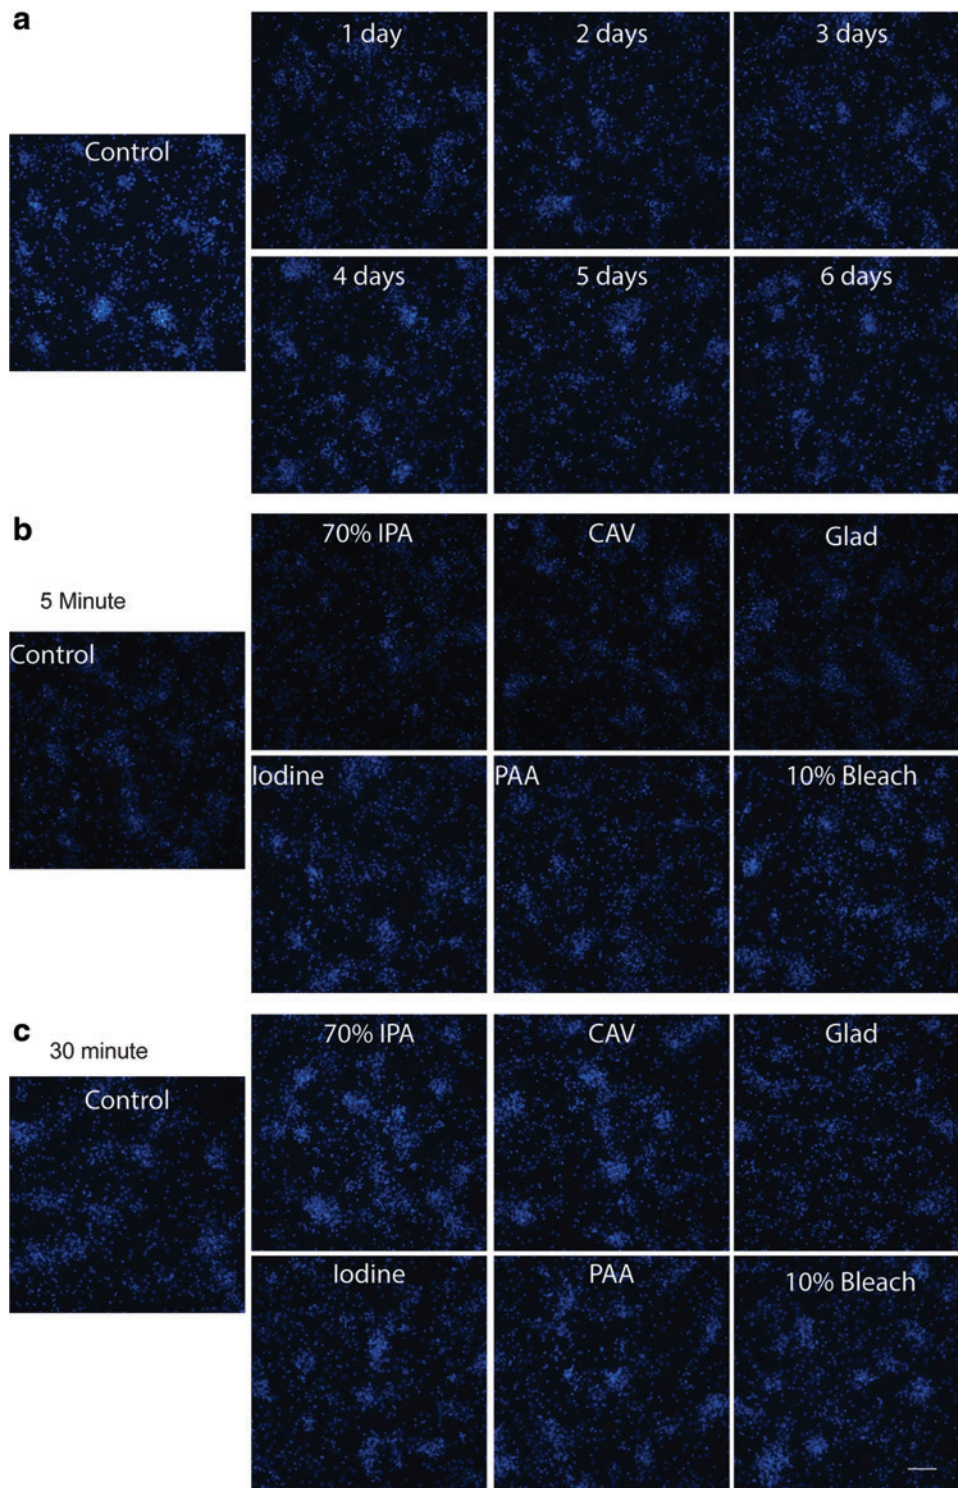

**Supplementary Figure S3.** Nuclear staining for experiments. **(a)** Nuclear staining (DAPI) of images from the slug assay (Fig. 2), **(b)** 5 minute incubation with decontamination solutions, and **(c)** 30 minute incubation with decontamination solutions (Fig. 4). After fixation, cells were stained in PBS solution with 0.1% TritonX-100 and 10ug/mL DAPI for 10 minutes. Cells were rinsed 2 times in PBS for 5 minutes each then imaged. Scale bar=100 um
