# Supplementary material
Source: PubMed Central journal article supplement (PMC5314999)
Supplement: Supp_Figure4.pdf [file Supp_Figure4.pdf]

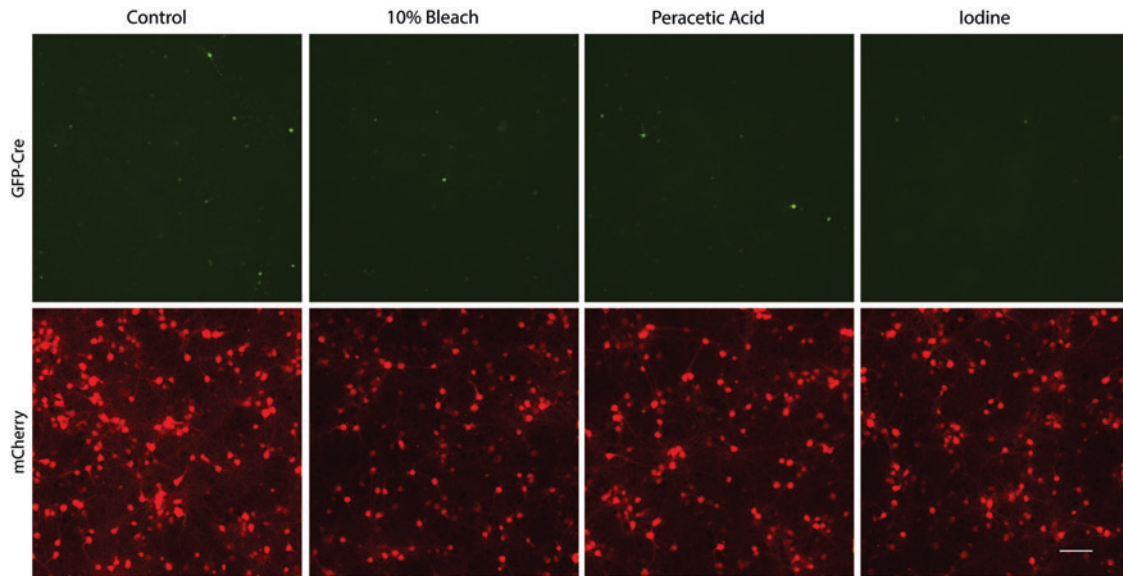

**Supplementary Figure S4.** Dialysis cassette integrity testing: Dialysis cassettes were pretreated with decontamination solutions (20  $\mu$ L of indicated solution added to 480  $\mu$ L of PBS with 0.5 mM  $\text{MgCl}_2$ ) and dialyzed overnight with 3 buffer changes. The solutions were removed from the dialysis cassettes and 2  $\mu$ L of AAV1-SP-GFP-Cre was mixed with 498  $\mu$ L PBS with 0.5 mM  $\text{MgCl}_2$  and added to the treated dialysis cassettes. The AAV was dialyzed overnight with 3 buffer changes, and concentrated. The AAV was added to rat primary cortical neuron cultures (DIV6) along with AAV1-EF1a-DIO-mCherry. Cultured were fixed on DIV15 and imaged. Images show that the decontamination solutions did not affect the integrity of the dialysis cassettes based on the presence of GFP and mCherry. Scale bar = 100  $\mu$ m

---
